# Supplementary material
Source: MDPI journal article supplement (https://www.mdpi.com/2673-9259/4/1/3)
Supplement: s1 [file s1]

Archive with 1 entries (1 files):
- jal-2793705-supplementary.pdf
